# Supplementary material for: Age-related deregulation of TDP-43 after stroke enhances NF-κB-mediated inflammation and neuronal damage
Source: PubMed Central journal article supplement (PMC6230239; doi:10.1186/s12974-018-1350-y), 2018-11-09
Supplement: 12974_2018_1350_MOESM1_ESM.pdf [file 12974_2018_1350_MOESM1_ESM.pdf]

# Supplemental Table 1

| Cod_BT N | Case | Age | Gender | Admission NIHSS | Vascular territory                                  | Intracranial occlusion site | Acute revascularization therapy | Hemorrhagic transformation                    | Etiology             | Exitus (days after onset) | Exitus to necropsy timelapse | Acute infection |
|----------|------|-----|--------|-----------------|-----------------------------------------------------|-----------------------------|---------------------------------|-----------------------------------------------|----------------------|---------------------------|------------------------------|-----------------|
| BK1823   | IC6  | 63  | Woman  | 20              | Right MCA infarct                                   | Right M1                    | Yes                             | No                                            | Undetermined         | 1 day                     | 2 h                          | Yes             |
| BK1560   | IC1  | 88  | Woman  | 19              | Right MCA infarction<br>Left MCA and IH2 recurrence | Right and Left M1           | Yes                             | No                                            | Cardio-embolic       | 5 days                    | 5:45 h                       | No              |
| BK1563   | IC2  | 79  | Man    | 4               | Left MCA infarct                                    | Left M2                     | None                            | Parieto-occipital parenchymal hematoma type 2 | Large vessel disease | 5 days                    | 4:35 h                       | No              |

Details and pathological features of the stroke subjects presented in figure 6
